# Supplementary material for: Prioritising in situ conservation of crop resources: A case study of African cowpea (Vigna unguiculata)
Source: PubMed Central journal article supplement — Sci Rep. 2014 Jun 17;4:5247. doi: 10.1038/srep05247 (PMC4060501; doi:10.1038/srep05247), 2014-06-17
Supplement: srep05247-s1.pdf [file srep05247-s1.pdf]

## Supplementary Information

Prioritising *in situ* conservation of crop resources: A case study of African cowpea (*Vigna unguiculata*)

C. Moray<sup>1</sup>, E.T. Game<sup>2</sup> and N. Maxted<sup>3</sup>

<sup>1</sup> Correspondence details: Centre for Macroevolution and Macroecology, Evolution, Ecology and Genetics, Research School of Biology, Australian National University, Canberra, ACT, 0200, Australia. E-mail: camile.moray@anu.edu.au, telephone: + 61 2 6125 9138

<sup>2</sup> The Nature Conservancy, West End, QLD, 4101, Australia

<sup>3</sup> University of Birmingham, School of Biosciences, Birmingham B15 2TT, UK

**Supplementary Table 1:** List of existing protected areas where African *Vigna* priority CWR may be found. The locations were identified by overlapping the occurrence data of *Vigna* priority CWR with established protected areas listed on the World Database on Protected Areas (see Methods).

| <b><i>Vigna</i> priority taxa</b> | <b>Site ID</b> | <b>Site name (English)</b> | <b>Country</b> | <b>Designation (English)</b> |
|-----------------------------------|----------------|----------------------------|----------------|------------------------------|
| <i>Vigna keraudrenii</i>          | 6932           | Ambohitantely              | Madagascar     | Special Reserve              |
| <i>Vigna schlechteri</i>          | 116359         | Bewaarkloof Nature Reserve | South Africa   | Nature Reserve               |
|                                   | 62326          | Blinkwater                 | South Africa   | Provincial Nature Reserve    |
|                                   | 2532           | Chimanimani                | Zimbabwe       | National Park                |
|                                   | 4944           | Doreen Clark               | South Africa   | Provincial Nature Reserve    |
|                                   | 879            | Golden Gate Highlands      | South Africa   | National Park                |
|                                   | 21156          | Jericho Dam                | South Africa   | Provincial Nature Reserve    |
|                                   | 4936           | Karkloof                   | South Africa   | Provincial Nature Reserve    |
|                                   | 7445           | Malolotja                  | Swaziland      | Nature Reserve               |
|                                   | 9103           | Midmar                     | South Africa   | Provincial Nature Reserve    |
|                                   | 4942           | Moor Park                  | South Africa   | Provincial Nature Reserve    |

| <b><i>Vigna</i> priority taxa</b>                  | <b>Site ID</b> | <b>Site name (English)</b>        | <b>Country</b>               | <b>Designation (English)</b> |
|----------------------------------------------------|----------------|-----------------------------------|------------------------------|------------------------------|
|                                                    | 300456         | Morgenstond                       | South Africa                 | Private Nature Reserve       |
|                                                    | 1356           | Motlatse Canyon                   | South Africa                 | Nature Reserve               |
|                                                    | 21154          | Mount Currie                      | South Africa                 | Provincial Nature Reserve    |
|                                                    | 300601         | Mount Sheba Nature Reserve        | South Africa                 | National Heritage Site       |
|                                                    | 39753          | Nkandla                           | South Africa                 | Provincial Nature Reserve    |
|                                                    | 39755          | Qudeni                            | South Africa                 | Provincial Nature Reserve    |
|                                                    | 26036          | Queen Elizabeth Park              | South Africa                 | Provincial Nature Reserve    |
|                                                    | 116267         | QwaQwa                            | South Africa                 | National Park                |
|                                                    | 1111           | Rhodes Nyanga                     | Zimbabwe                     | National Park                |
|                                                    | 26043          | Umvoti Vlei                       | South Africa                 | Provincial Nature Reserve    |
|                                                    | 26042          | Wagendrift                        | South Africa                 | Provincial Nature Reserve    |
|                                                    | 9106           | Weenen                            | South Africa                 | Provincial Nature Reserve    |
|                                                    | 116375         | Wolkberg (serala) Wilderness Area | South Africa                 | Conservation Area            |
| <i>Vigna schlechteri</i>                           | 9076           | Wolkberg Caves                    | South Africa                 | Nature Reserve               |
| <i>Vigna unguiculata</i> subsp. <i>baoulensis</i>  | 7523           | Comoé                             | Côte d'Ivoire                | National Park                |
| <i>Vigna unguiculata</i> subsp. <i>dekindtiana</i> | 39745          | Amatikulu                         | South Africa                 | Provincial Nature Reserve    |
|                                                    | 925            | Arusha                            | Tanzania, United Republic of | National Park                |

| <b><i>Vigna</i> priority taxa</b> | <b>Site ID</b> | <b>Site name (English)</b> | <b>Country</b>               | <b>Designation (English)</b> |
|-----------------------------------|----------------|----------------------------|------------------------------|------------------------------|
|                                   | 652            | Awash                      | Ethiopia                     | National Park                |
|                                   | 350009         | Baga I (Mzinga)            | Tanzania, United Republic of | Forest Reserve               |
|                                   | 303471         | Balangai West              | Tanzania, United Republic of | Forest Reserve               |
|                                   | 301476         | Bamba Ridge                | Tanzania, United Republic of | Forest Reserve               |
|                                   | 802            | Bazaruto                   | Mozambique                   | National Park                |
|                                   | 39829          | Botsolano Game Park        | South Africa                 | Game Farm                    |
|                                   | 1438           | Bugungu                    | Uganda                       | Wildlife Reserve             |
|                                   | 671            | Bui                        | Ghana                        | National Park                |
|                                   | 18437          | Bwindi Impenetrable        | Uganda                       | National Park                |
|                                   | 7510           | Central Kalahari           | Botswana                     | Game Reserve                 |
|                                   | 2532           | Chimanimani                | Zimbabwe                     | National Park                |
|                                   | 600            | Chobe                      | Botswana                     | National Park                |
|                                   | 19563          | Chyulu                     | Kenya                        | National Park                |
|                                   | 1362           | Daan Viljoen               | Namibia                      | Game Park                    |
|                                   | 866            | Delta du Saloum            | Senegal                      | National Park                |
|                                   | 301561         | Dindili                    | Tanzania, United Republic of | Forest Reserve               |
|                                   | 7381           | Doorndraai Dam             | South Africa                 | Nature Reserve               |

| <i>Vigna</i> priority taxa                         | Site ID | Site name (English)                         | Country                             | Designation (English)     |
|----------------------------------------------------|---------|---------------------------------------------|-------------------------------------|---------------------------|
|                                                    | 32911   | Entabeni                                    | South Africa                        | Nature Reserve            |
|                                                    | 884     | Etosha                                      | Namibia                             | National Park             |
|                                                    | 13704   | Gambella                                    | Ethiopia                            | National Park             |
|                                                    | 1083    | Garamba                                     | Democratic Republic of the<br>Congo | National Park             |
|                                                    | 4650    | Gilú                                        | Mozambique                          | Game Reserve              |
|                                                    | 926     | Gombe                                       | Tanzania, United Republic of        | National Park             |
|                                                    | 116275  | Greater St Lucia Wetland Nature Reserve     | South Africa                        | Provincial Nature Reserve |
| <i>Vigna unguiculata</i> subsp. <i>dekindtiana</i> | 300436  | Groot-letaba Wildreservaat Wildlife Reserve | South Africa                        | Wildlife Management Area  |
|                                                    | 9125    | Hans Strijdom                               | South Africa                        | Nature Reserve            |
|                                                    | 4766    | Happy Rest                                  | South Africa                        | Nature Reserve            |
|                                                    | 4943    | Harold Johnson                              | South Africa                        | Provincial Nature Reserve |
|                                                    | 1991    | Hwange (Wankie)                             | Zimbabwe                            | National Park             |
|                                                    | 21156   | Jericho Dam                                 | South Africa                        | Provincial Nature Reserve |
|                                                    | 1085    | Kafue                                       | Zambia                              | National Park             |
|                                                    | 1439    | Karuma                                      | Uganda                              | Wildlife Reserve          |
|                                                    | 17999   | Khaudum                                     | Namibia                             | Game Park                 |

| <b><i>Vigna</i> priority taxa</b> | <b>Site ID</b> | <b>Site name (English)</b> | <b>Country</b>               | <b>Designation (English)</b> |
|-----------------------------------|----------------|----------------------------|------------------------------|------------------------------|
|                                   | 7507           | Khutse                     | Botswana                     | Game Reserve                 |
|                                   | 9161           | Kibira                     | Burundi                      | National Park                |
|                                   | 922            | Kilimanjaro                | Tanzania, United Republic of | National Park                |
|                                   | 7520           | Kimboza                    | Tanzania, United Republic of | Forest Reserve               |
|                                   | 301465         | Kisima Gonja               | Tanzania, United Republic of | Forest Reserve               |
|                                   | 301557         | Kitulanghalo               | Tanzania, United Republic of | Forest Reserve               |
|                                   | 300443         | Klaserie                   | South Africa                 | Private Nature Reserve       |
|                                   | 300442         | Kuschke                    | South Africa                 | Nature Reserve               |
|                                   | 301487         | Kwamarimba                 | Tanzania, United Republic of | Forest Reserve               |
|                                   | 301479         | Kwamgumi                   | Tanzania, United Republic of | Forest Reserve               |
|                                   | 924            | Lake Manyara               | Tanzania, United Republic of | National Park                |
|                                   | 869            | Langue de Barbarie         | Senegal                      | National Park                |
|                                   | 2315           | Lengwe                     | Malawi                       | National Park                |
|                                   | 7962           | Lower Zambezi              | Zambia                       | National Park                |
|                                   | 3066           | Luando                     | Angola                       | Integral Nature Reserve      |
|                                   | 39832          | Madikwe                    | South Africa                 | Nature Reserve               |
|                                   | 351706         | Magoroto                   | Tanzania, United Republic of | Forest Reserve               |

| <b><i>Vigna</i> priority taxa</b>                  | <b>Site ID</b> | <b>Site name (English)</b>   | <b>Country</b>               | <b>Designation (English)</b> |
|----------------------------------------------------|----------------|------------------------------|------------------------------|------------------------------|
| <i>Vigna unguiculata</i> subsp. <i>dekindtiana</i> | 7521           | Mahale                       | Tanzania, United Republic of | National Park                |
|                                                    | 23072          | Mahango Game Reserve         | Namibia                      | Reserve                      |
|                                                    | 2319           | Majete                       | Malawi                       | Wildlife Reserve             |
|                                                    | 301553         | Mamiwa Kisara                | Tanzania, United Republic of | Forest Reserve               |
|                                                    | 301484         | Manga                        | Tanzania, United Republic of | Forest Reserve               |
|                                                    | 315485         | Maputaland                   | South Africa                 | Marine Protected Area        |
|                                                    | 4652           | Maputo                       | Mozambique                   | Special Reserve              |
|                                                    | 313109         | Mgahinga Gorilla             | Uganda                       | National Park                |
|                                                    | 919            | Mikumi                       | Tanzania, United Republic of | National Park                |
|                                                    | 350008         | Mkussu                       | Tanzania, United Republic of | Forest Reserve               |
|                                                    | 7451           | Mlawula                      | Swaziland                    | Nature Reserve               |
|                                                    | 351705         | Mlinga                       | Tanzania, United Republic of | Forest Reserve               |
|                                                    | 7449           | Moremi                       | Botswana                     | Game Reserve                 |
|                                                    | 300456         | Morgenstond                  | South Africa                 | Private Nature Reserve       |
|                                                    | 2347           | Mosi-Oa-Tunya                | Zambia                       | National Park                |
|                                                    | 1356           | Motlatse Canyon              | South Africa                 | Nature Reserve               |
| 7886                                               | Mount Meru     | Tanzania, United Republic of | Game Reserve                 |                              |

| <b><i>Vigna</i> priority taxa</b>                  | <b>Site ID</b> | <b>Site name (English)</b> | <b>Country</b>               | <b>Designation (English)</b> |
|----------------------------------------------------|----------------|----------------------------|------------------------------|------------------------------|
|                                                    | 303328         | Mount Meru                 | Tanzania, United Republic of | National Park                |
|                                                    | 300601         | Mount Sheba Nature Reserve | South Africa                 | National Heritage Site       |
|                                                    | 7505           | Moyowosi                   | Tanzania, United Republic of | Game Reserve                 |
|                                                    | 301453         | Mtumbi                     | Tanzania, United Republic of | Forest Reserve               |
|                                                    | 2249           | Mupa                       | Angola                       | National Park                |
|                                                    | 956            | Murchison Falls            | Uganda                       | National Park                |
|                                                    | 301491         | Mwenga                     | Tanzania, United Republic of | Forest Reserve               |
|                                                    | 2251           | Namibe                     | Angola                       | Partial Reserve              |
|                                                    | 301475         | Ndelemai                   | Tanzania, United Republic of | Forest Reserve               |
|                                                    | 301488         | Ndolwa                     | Tanzania, United Republic of | Forest Reserve               |
|                                                    | 303367         | Nilo                       | Tanzania, United Republic of | Nature Reserve               |
|                                                    | 9115           | Nwanedi                    | South Africa                 | Nature Reserve               |
|                                                    | 601            | Nxai Pan                   | Botswana                     | National Park                |
| <i>Vigna unguiculata</i> subsp. <i>dekindtiana</i> | 779            | Nyika                      | Malawi                       | National Park                |
|                                                    | 7384           | Nylsvley                   | South Africa                 | Nature Reserve               |
|                                                    | 9148           | Nyungwe                    | Rwanda                       | National Park                |
|                                                    | 5154           | Owabi                      | Ghana                        | Wildlife Sanctuary           |

| <b><i>Vigna</i> priority taxa</b> | <b>Site ID</b> | <b>Site name (English)</b>    | <b>Country</b>               | <b>Designation (English)</b> |
|-----------------------------------|----------------|-------------------------------|------------------------------|------------------------------|
|                                   | 1435           | Pian Upe                      | Uganda                       | Wildlife Reserve             |
|                                   | 300440         | Pietersburg Game Reserve      | South Africa                 | Game Farm                    |
|                                   | 18001          | Popa                          | Namibia                      | Game Park                    |
|                                   | 1110           | Rhodes Matopos                | Zimbabwe                     | National Park                |
|                                   | 1111           | Rhodes Nyanga                 | Zimbabwe                     | National Park                |
|                                   | 7387           | Roodeplaar Dam                | South Africa                 | Provincial Nature Reserve    |
|                                   | 303560         | Ruvu                          | Tanzania, United Republic of | Forest Reserve               |
|                                   | 18438          | Rwenzori Mountains            | Uganda                       | National Park                |
|                                   | 301480         | Segoma                        | Tanzania, United Republic of | Forest Reserve               |
|                                   | 300439         | Selati Game Reserve           | South Africa                 | Game Farm                    |
|                                   | 351704         | Semdoe                        | Tanzania, United Republic of | Forest Reserve               |
|                                   | 40042          | Semuliki                      | Uganda                       | National Park                |
|                                   | 759            | Shimba Hills                  | Kenya                        | National Reserve             |
|                                   | 301450         | Shume Magamba                 | Tanzania, United Republic of | Forest Reserve               |
|                                   | 116333         | Sileza Nature Reserve         | South Africa                 | Provincial Nature Reserve    |
|                                   | 39758          | Tembe                         | South Africa                 | Provincial Nature Reserve    |
|                                   | 1440           | Toro-Semuliki or Toro-Semliki | Uganda                       | Wildlife Reserve             |

| <b><i>Vigna</i> priority taxa</b>                  | <b>Site ID</b> | <b>Site name (English)</b>        | <b>Country</b>                      | <b>Designation (English)</b> |
|----------------------------------------------------|----------------|-----------------------------------|-------------------------------------|------------------------------|
|                                                    | 301577         | Ukwiva                            | Tanzania, United Republic of        | Forest Reserve               |
|                                                    | 301564         | Uluguru North                     | Tanzania, United Republic of        | Forest Reserve               |
|                                                    | 301578         | Uluguru South                     | Tanzania, United Republic of        | Forest Reserve               |
|                                                    | 26030          | Umlalazi                          | South Africa                        | Provincial Nature Reserve    |
|                                                    | 26982          | Unnamed Bird Sanctuary            | Zambia                              | Bird Sanctuary               |
|                                                    | 1993           | Victoria Falls                    | Zimbabwe                            | National Park                |
|                                                    | 1081           | Virunga                           | Democratic Republic of the<br>Congo | National Park                |
| <i>Vigna unguiculata</i> subsp. <i>dekindtiana</i> | 303476         | Vugiri                            | Tanzania, United Republic of        | Forest Reserve               |
|                                                    | 4648           | Vwaza Marsh                       | Malawi                              | Wildlife Reserve             |
|                                                    | 608            | Waza                              | Cameroon                            | National Park                |
|                                                    | 116375         | Wolkberg (serala) Wilderness Area | South Africa                        | Conservation Area            |
|                                                    | 2530           | Zambezi                           | Zimbabwe                            | National Park                |
| <i>Vigna unguiculata</i> subsp. <i>pawekiae</i>    | 18437          | Bwindi Impenetrable               | Uganda                              | National Park                |
|                                                    | 1082           | Kahuzi-Biega                      | Democratic Republic of the<br>Congo | National Park                |
|                                                    | 9161           | Kibira                            | Burundi                             | National Park                |

| <b><i>Vigna</i> priority taxa</b>                | <b>Site ID</b> | <b>Site name (English)</b> | <b>Country</b>                      | <b>Designation (English)</b> |
|--------------------------------------------------|----------------|----------------------------|-------------------------------------|------------------------------|
|                                                  | 303433         | Kileo East                 | Tanzania, United Republic of        | Forest Reserve               |
|                                                  | 922            | Kilimanjaro                | Tanzania, United Republic of        | National Park                |
|                                                  | 762            | Lake Nakuru                | Kenya                               | National Park                |
|                                                  | 5166           | Mandelia                   | Chad                                | Faunal Reserve               |
|                                                  | 313109         | Mgahinga Gorilla           | Uganda                              | National Park                |
|                                                  | 760            | Mount Elgon                | Kenya                               | National Park                |
|                                                  | 779            | Nyika                      | Malawi                              | National Park                |
|                                                  | 9148           | Nyungwe                    | Rwanda                              | National Park                |
|                                                  | 9162           | Rusizi                     | Burundi                             | National Park                |
|                                                  | 18438          | Rwenzori Mountains         | Uganda                              | National Park                |
|                                                  | 752            | Tsavo East                 | Kenya                               | National Park                |
|                                                  | 1081           | Virunga                    | Democratic Republic of the<br>Congo | National Park                |
| <i>Vigna unguiculata</i> subsp. <i>pubescens</i> | 301476         | Bamba Ridge                | Tanzania, United Republic of        | Forest Reserve               |
|                                                  | 801            | Gorongosa                  | Mozambique                          | National Park                |
|                                                  | 921            | Katavi                     | Tanzania, United Republic of        | National Park                |
|                                                  | 301487         | Kwamarimba                 | Tanzania, United Republic of        | Forest Reserve               |

| <b><i>Vigna</i> priority taxa</b>                  | <b>Site ID</b> | <b>Site name (English)</b> | <b>Country</b>               | <b>Designation (English)</b> |
|----------------------------------------------------|----------------|----------------------------|------------------------------|------------------------------|
| <i>Vigna unguiculata</i> subsp. <i>pubescens</i>   | 301479         | Kwamgumi                   | Tanzania, United Republic of | Forest Reserve               |
|                                                    | 351706         | Magoroto                   | Tanzania, United Republic of | Forest Reserve               |
|                                                    | 301484         | Manga                      | Tanzania, United Republic of | Forest Reserve               |
|                                                    | 351705         | Mlinga                     | Tanzania, United Republic of | Forest Reserve               |
|                                                    | 28175          | Mount Elgon                | Uganda                       | National Park                |
|                                                    | 7438           | Rungwa                     | Tanzania, United Republic of | Game Reserve                 |
|                                                    | 301480         | Segoma                     | Tanzania, United Republic of | Forest Reserve               |
|                                                    | 916            | Serengeti                  | Tanzania, United Republic of | National Park                |
|                                                    | 759            | Shimba Hills               | Kenya                        | National Reserve             |
|                                                    | 7502           | Uwanda                     | Tanzania, United Republic of | Game Reserve                 |
| <i>Vigna unguiculata</i> subsp. <i>stenophylla</i> | 875            | Addo Elephant              | South Africa                 | National Park                |
|                                                    | 39745          | Amatikulu                  | South Africa                 | Provincial Nature Reserve    |
|                                                    | 300586         | Beaulieu                   | South Africa                 | Bird Sanctuary               |
|                                                    | 300561         | Beggar's Bush              | South Africa                 | Provincial Nature Reserve    |
|                                                    | 116359         | Bewaarkloof Nature Reserve | South Africa                 | Nature Reserve               |
|                                                    | 62326          | Blinkwater                 | South Africa                 | Provincial Nature Reserve    |
|                                                    | 9093           | Bloemhof Dam               | South Africa                 | Nature Reserve               |

| <b><i>Vigna</i> priority taxa</b>                  | <b>Site ID</b> | <b>Site name (English)</b>              | <b>Country</b> | <b>Designation (English)</b>              |
|----------------------------------------------------|----------------|-----------------------------------------|----------------|-------------------------------------------|
|                                                    | 4938           | Bluff                                   | South Africa   | Provincial Nature Reserve                 |
|                                                    | 4944           | Doreen Clark                            | South Africa   | Provincial Nature Reserve                 |
|                                                    | 4934           | Entumeni                                | South Africa   | Provincial Nature Reserve                 |
|                                                    | 300559         | Fort Grey State Forest                  | South Africa   | DWAF (Dept. Water & Forestry) Forest Area |
|                                                    | 801            | Gorongosa                               | Mozambique     | National Park                             |
|                                                    | 116275         | Greater St Lucia Wetland Nature Reserve | South Africa   | Provincial Nature Reserve                 |
|                                                    | 4943           | Harold Johnson                          | South Africa   | Provincial Nature Reserve                 |
|                                                    | 39746          | Hlatikulu                               | South Africa   | Provincial Nature Reserve                 |
|                                                    | 116189         | Hluhluwe-umfolozi                       | South Africa   | Provincial Nature Reserve                 |
|                                                    | 1350           | Ithala                                  | South Africa   | Provincial Nature Reserve                 |
|                                                    | 4940           | Kenneth Stainbank                       | South Africa   | Provincial Nature Reserve                 |
|                                                    | 9161           | Kibira                                  | Burundi        | National Park                             |
|                                                    | 26031          | Krantzkloof                             | South Africa   | Provincial Nature Reserve                 |
|                                                    | 26044          | Lake Eteza                              | South Africa   | Provincial Nature Reserve                 |
| <i>Vigna unguiculata</i> subsp. <i>stenophylla</i> | 116363         | Legalameetse                            | South Africa   | Nature Reserve                            |
|                                                    | 23072          | Mahango Game Reserve                    | Namibia        | Reserve                                   |

| <b><i>Vigna</i> priority taxa</b> | <b>Site ID</b> | <b>Site name (English)</b> | <b>Country</b> | <b>Designation (English)</b> |
|-----------------------------------|----------------|----------------------------|----------------|------------------------------|
|                                   | 7445           | Malolotja                  | Swaziland      | Nature Reserve               |
|                                   | 315485         | Maputaland                 | South Africa   | Marine Protected Area        |
|                                   | 300423         | Marico-bosveld             | South Africa   | Nature Reserve               |
|                                   | 21161          | Marievale                  | South Africa   | Provincial Nature Reserve    |
|                                   | 116325         | Mehlomnyama                | South Africa   | Provincial Nature Reserve    |
|                                   | 9103           | Midmar                     | South Africa   | Provincial Nature Reserve    |
|                                   | 7451           | Mlawula                    | Swaziland      | Nature Reserve               |
|                                   | 1356           | Motlatse Canyon            | South Africa   | Nature Reserve               |
|                                   | 300601         | Mount Sheba Nature Reserve | South Africa   | National Heritage Site       |
|                                   | 33139          | Mpenjati                   | South Africa   | Provincial Nature Reserve    |
|                                   | 116329         | Ndumo                      | South Africa   | Provincial Nature Reserve    |
|                                   | 26040          | North Park                 | South Africa   | Provincial Nature Reserve    |
|                                   | 116330         | Ophathe                    | South Africa   | Provincial Nature Reserve    |
|                                   | 4759           | Oribi Gorge                | South Africa   | Provincial Nature Reserve    |
|                                   | 300422         | Pienaar                    | South Africa   | Nature Reserve               |
|                                   | 306181         | Pondoland                  | South Africa   | Marine Protected Area        |
|                                   | 18001          | Popa                       | Namibia        | Game Park                    |

| <b><i>Vigna</i> priority taxa</b>                  | <b>Site ID</b> | <b>Site name (English)</b> | <b>Country</b> | <b>Designation (English)</b> |
|----------------------------------------------------|----------------|----------------------------|----------------|------------------------------|
|                                                    | 26036          | Queen Elizabeth Park       | South Africa   | Provincial Nature Reserve    |
|                                                    | 7387           | Roodeplaar Dam             | South Africa   | Provincial Nature Reserve    |
|                                                    | 9162           | Rusizi                     | Burundi        | National Park                |
|                                                    | 4765           | Rustenburg                 | South Africa   | Nature Reserve               |
|                                                    | 300602         | Sabie Sabie Game Reserve   | South Africa   | Game Farm                    |
|                                                    | 9084           | Sandveld                   | South Africa   | Nature Reserve               |
|                                                    | 300428         | Schoonspruit               | South Africa   | Nature Reserve               |
|                                                    | 7447           | Sehlabathebe               | Lesotho        | National Park                |
|                                                    | 116333         | Sileza Nature Reserve      | South Africa   | Provincial Nature Reserve    |
| <i>Vigna unguiculata</i> subsp. <i>stenophylla</i> | 62365          | Skyline                    | South Africa   | Provincial Nature Reserve    |
|                                                    | 315490         | St. Lucia                  | South Africa   | Marine Protected Area        |
|                                                    | 39758          | Tembe                      | South Africa   | Provincial Nature Reserve    |
|                                                    | 315491         | Trafalgar                  | South Africa   | Marine Protected Area        |
|                                                    | 26030          | Umlalazi                   | South Africa   | Provincial Nature Reserve    |
|                                                    | 1353           | Umtamvuna                  | South Africa   | Provincial Nature Reserve    |
|                                                    | 26043          | Umvoti Vlei                | South Africa   | Provincial Nature Reserve    |
|                                                    | 33140          | Vryheid Mountain           | South Africa   | Provincial Nature Reserve    |

| <b><i>Vigna</i> priority taxa</b>             | <b>Site ID</b> | <b>Site name (English)</b>                | <b>Country</b> | <b>Designation (English)</b> |
|-----------------------------------------------|----------------|-------------------------------------------|----------------|------------------------------|
|                                               | 33088          | Water's Meeting Provincial Nature Reserve | South Africa   | Provincial Nature Reserve    |
|                                               | 116355         | Witwatersrand Botanical Garden            | South Africa   | Botanical Garden             |
|                                               | 116375         | Wolkberg (serala) Wilderness Area         | South Africa   | Conservation Area            |
| <i>Vigna unguiculata</i> subsp. <i>tenuis</i> | 39745          | Amatikulu                                 | South Africa   | Provincial Nature Reserve    |
|                                               | 802            | Bazaruto                                  | Mozambique     | National Park                |
|                                               | 4938           | Bluff                                     | South Africa   | Provincial Nature Reserve    |
|                                               | 2532           | Chimanimani                               | Zimbabwe       | National Park                |
|                                               | 7381           | Doorndraai Dam                            | South Africa   | Nature Reserve               |
|                                               | 116275         | Greater St Lucia Wetland Nature Reserve   | South Africa   | Provincial Nature Reserve    |
|                                               | 4943           | Harold Johnson                            | South Africa   | Provincial Nature Reserve    |
|                                               | 39746          | Hlatikulu                                 | South Africa   | Provincial Nature Reserve    |
|                                               | 4940           | Kenneth Stainbank                         | South Africa   | Provincial Nature Reserve    |
|                                               | 26031          | Krantzkloof                               | South Africa   | Provincial Nature Reserve    |
|                                               | 4652           | Maputo                                    | Mozambique     | Special Reserve              |
|                                               | 4649           | Marromeu                                  | Mozambique     | Game Reserve                 |
|                                               | 116325         | Mehlomnyama                               | South Africa   | Provincial Nature Reserve    |
|                                               | 4942           | Moor Park                                 | South Africa   | Provincial Nature Reserve    |

| <b><i>Vigna</i> priority taxa</b>                                        | <b>Site ID</b> | <b>Site name (English)</b> | <b>Country</b> | <b>Designation (English)</b> |
|--------------------------------------------------------------------------|----------------|----------------------------|----------------|------------------------------|
|                                                                          | 33139          | Mpenjati                   | South Africa   | Provincial Nature Reserve    |
|                                                                          | 26040          | North Park                 | South Africa   | Provincial Nature Reserve    |
|                                                                          | 7384           | Nylsvley                   | South Africa   | Nature Reserve               |
| <i>Vigna unguiculata</i> subsp. <i>tenuis</i>                            | 4759           | Oribi Gorge                | South Africa   | Provincial Nature Reserve    |
|                                                                          | 306181         | Pondoland                  | South Africa   | Marine Protected Area        |
|                                                                          | 26036          | Queen Elizabeth Park       | South Africa   | Provincial Nature Reserve    |
|                                                                          | 62365          | Skyline                    | South Africa   | Provincial Nature Reserve    |
|                                                                          | 315491         | Trafalgar                  | South Africa   | Marine Protected Area        |
|                                                                          | 1353           | Umtamvuna                  | South Africa   | Provincial Nature Reserve    |
|                                                                          | 26042          | Wagendrift                 | South Africa   | Provincial Nature Reserve    |
|                                                                          | 9106           | Weenen                     | South Africa   | Provincial Nature Reserve    |
| <i>Vigna unguiculata</i> subsp. <i>unguiculata</i> var. <i>spontanea</i> | 7451           | Mlawula                    | Swaziland      | Nature Reserve               |
|                                                                          | 2249           | Mupa                       | Angola         | National Park                |
|                                                                          | 2251           | Namibe                     | Angola         | Partial Reserve              |

**Supplementary Table 2: List of established protected areas across Africa where multiple priority *Vigna* CWR may be found, based on overlap between occurrence data of priority *Vigna* CWR and African protected areas listed on the World Database on Protected Areas (see Methods).**

| Protected Area Name (English)           | Site ID | Country      | Designation               | <i>Vigna</i> priority taxa                                                                                                                                  |
|-----------------------------------------|---------|--------------|---------------------------|-------------------------------------------------------------------------------------------------------------------------------------------------------------|
| Kibira                                  | 9161    | Burundi      | National Park             | <i>Vigna unguiculata</i> subsp. <i>dekindtiana</i><br><i>Vigna unguiculata</i> subsp. <i>pawekiae</i><br><i>Vigna unguiculata</i> subsp. <i>stenophylla</i> |
| Amatikulu                               | 39745   | South Africa | Provincial Nature Reserve | <i>Vigna unguiculata</i> subsp. <i>dekindtiana</i><br><i>Vigna unguiculata</i> subsp. <i>stenophylla</i><br><i>Vigna unguiculata</i> subsp. <i>tenuis</i>   |
| Greater St Lucia Wetland Nature Reserve | 116275  | South Africa | Provincial Nature Reserve | <i>Vigna unguiculata</i> subsp. <i>dekindtiana</i><br><i>Vigna unguiculata</i> subsp. <i>stenophylla</i><br><i>Vigna unguiculata</i> subsp. <i>tenuis</i>   |
| Harold Johnson                          | 4943    | South Africa | Provincial Nature Reserve | <i>Vigna unguiculata</i> subsp. <i>dekindtiana</i><br><i>Vigna unguiculata</i> subsp. <i>stenophylla</i>                                                    |

*Vigna unguiculata* subsp. *tenuis*

---

|                                   |        |              |                           |                                                                          |
|-----------------------------------|--------|--------------|---------------------------|--------------------------------------------------------------------------|
| Motlatse Canyon                   | 1356   | South Africa | Nature Reserve            | <i>Vigna schlechteri</i>                                                 |
|                                   |        |              |                           | <i>Vigna unguiculata</i> subsp. <i>dekindtiana</i>                       |
|                                   |        |              |                           | <i>Vigna unguiculata</i> subsp. <i>stenophylla</i>                       |
| Mount Sheba Nature Reserve        | 300601 | South Africa | National Heritage Site    | <i>Vigna schlechteri</i>                                                 |
|                                   |        |              |                           | <i>Vigna unguiculata</i> subsp. <i>dekindtiana</i>                       |
|                                   |        |              |                           | <i>Vigna unguiculata</i> subsp. <i>stenophylla</i>                       |
| Queen Elizabeth Park              | 26036  | South Africa | Provincial Nature Reserve | <i>Vigna schlechteri</i>                                                 |
|                                   |        |              |                           | <i>Vigna unguiculata</i> subsp. <i>stenophylla</i>                       |
|                                   |        |              |                           | <i>Vigna unguiculata</i> subsp. <i>tenuis</i>                            |
| Wolkberg (serala) Wilderness Area | 116375 | South Africa | Conservation Area         | <i>Vigna schlechteri</i>                                                 |
|                                   |        |              |                           | <i>Vigna unguiculata</i> subsp. <i>dekindtiana</i>                       |
|                                   |        |              |                           | <i>Vigna unguiculata</i> subsp. <i>stenophylla</i>                       |
| Mlawula                           | 7451   | Swaziland    | Nature Reserve            | <i>Vigna unguiculata</i> subsp. <i>dekindtiana</i>                       |
|                                   |        |              |                           | <i>Vigna unguiculata</i> subsp. <i>stenophylla</i>                       |
|                                   |        |              |                           | <i>Vigna unguiculata</i> subsp. <i>unguiculata</i> var. <i>spontanea</i> |
| Chimanimani                       | 2532   | Zimbabwe     | National Park             | <i>Vigna schlechteri</i>                                                 |
|                                   |        |              |                           | <i>Vigna unguiculata</i> subsp. <i>dekindtiana</i>                       |

---

*Vigna unguiculata* subsp. *tenuis*

---

|              |      |                                  |                  |                                                                          |
|--------------|------|----------------------------------|------------------|--------------------------------------------------------------------------|
| Mupa         | 2249 | Angola                           | National Park    | <i>Vigna unguiculata</i> subsp. <i>dekindtiana</i>                       |
|              |      |                                  |                  | <i>Vigna unguiculata</i> subsp. <i>unguiculata</i> var. <i>spontanea</i> |
| Namibe       | 2251 | Angola                           | Partial Reserve  | <i>Vigna unguiculata</i> subsp. <i>dekindtiana</i>                       |
|              |      |                                  |                  | <i>Vigna unguiculata</i> subsp. <i>unguiculata</i> var. <i>spontanea</i> |
| Rusizi       | 9162 | Burundi                          | National Park    | <i>Vigna unguiculata</i> subsp. <i>pawekiae</i>                          |
|              |      |                                  |                  | <i>Vigna unguiculata</i> subsp. <i>stenophylla</i>                       |
| Virunga      | 1081 | Democratic Republic of the Congo | National Park    | <i>Vigna unguiculata</i> subsp. <i>dekindtiana</i>                       |
|              |      |                                  |                  | <i>Vigna unguiculata</i> subsp. <i>pawekiae</i>                          |
| Mount Elgon  | 760  | Kenya                            | National Park    | <i>Vigna unguiculata</i> subsp. <i>pawekiae</i>                          |
|              |      |                                  |                  | <i>Vigna unguiculata</i> subsp. <i>pubescens</i>                         |
| Shimba Hills | 759  | Kenya                            | National Reserve | <i>Vigna unguiculata</i> subsp. <i>dekindtiana</i>                       |
|              |      |                                  |                  | <i>Vigna unguiculata</i> subsp. <i>pubescens</i>                         |
| Nyika        | 779  | Malawi                           | National Park    | <i>Vigna unguiculata</i> subsp. <i>dekindtiana</i>                       |
|              |      |                                  |                  | <i>Vigna unguiculata</i> subsp. <i>pawekiae</i>                          |
| Bazaruto     | 802  | Mozambique                       | National Park    | <i>Vigna unguiculata</i> subsp. <i>dekindtiana</i>                       |
|              |      |                                  |                  | <i>Vigna unguiculata</i> subsp. <i>tenuis</i>                            |
| Gorongosa    | 801  | Mozambique                       | National Park    | <i>Vigna unguiculata</i> subsp. <i>pubescens</i>                         |

---

|                      |       |              |                           |                                                    |
|----------------------|-------|--------------|---------------------------|----------------------------------------------------|
|                      |       |              |                           | <i>Vigna unguiculata</i> subsp. <i>stenophylla</i> |
| Maputo               | 4652  | Mozambique   | Special Reserve           | <i>Vigna unguiculata</i> subsp. <i>dekindtiana</i> |
|                      |       |              |                           | <i>Vigna unguiculata</i> subsp. <i>tenuis</i>      |
| Mahango Game Reserve | 23072 | Namibia      | Reserve                   | <i>Vigna unguiculata</i> subsp. <i>dekindtiana</i> |
|                      |       |              |                           | <i>Vigna unguiculata</i> subsp. <i>stenophylla</i> |
| Popa                 | 18001 | Namibia      | Game Park                 | <i>Vigna unguiculata</i> subsp. <i>dekindtiana</i> |
|                      |       |              |                           | <i>Vigna unguiculata</i> subsp. <i>stenophylla</i> |
| Nyungwe              | 9148  | Rwanda       | National Park             | <i>Vigna unguiculata</i> subsp. <i>dekindtiana</i> |
|                      |       |              |                           | <i>Vigna unguiculata</i> subsp. <i>pawekiae</i>    |
| Bluff                | 4938  | South Africa | Provincial Nature Reserve | <i>Vigna unguiculata</i> subsp. <i>stenophylla</i> |
|                      |       |              |                           | <i>Vigna unguiculata</i> subsp. <i>tenuis</i>      |
| Doorndraai Dam       | 7381  | South Africa | Nature Reserve            | <i>Vigna unguiculata</i> subsp. <i>dekindtiana</i> |
|                      |       |              |                           | <i>Vigna unguiculata</i> subsp. <i>tenuis</i>      |
| Doreen Clark         | 4944  | South Africa | Provincial Nature Reserve | <i>Vigna schlechteri</i>                           |
|                      |       |              |                           | <i>Vigna unguiculata</i> subsp. <i>stenophylla</i> |
| Hlatikulu            | 39746 | South Africa | Provincial Nature Reserve | <i>Vigna unguiculata</i> subsp. <i>stenophylla</i> |
|                      |       |              |                           | <i>Vigna unguiculata</i> subsp. <i>tenuis</i>      |
| Jericho Dam          | 21156 | South Africa | Provincial Nature Reserve | <i>Vigna schlechteri</i>                           |

*Vigna unguiculata* subsp. *dekindtiana*

---

|                   |      |              |                           |                                                    |
|-------------------|------|--------------|---------------------------|----------------------------------------------------|
| Kenneth Stainbank | 4940 | South Africa | Provincial Nature Reserve | <i>Vigna unguiculata</i> subsp. <i>stenophylla</i> |
|-------------------|------|--------------|---------------------------|----------------------------------------------------|

*Vigna unguiculata* subsp. *tenuis*

---

|             |       |              |                           |                                                    |
|-------------|-------|--------------|---------------------------|----------------------------------------------------|
| Krantzkloof | 26031 | South Africa | Provincial Nature Reserve | <i>Vigna unguiculata</i> subsp. <i>stenophylla</i> |
|-------------|-------|--------------|---------------------------|----------------------------------------------------|

*Vigna unguiculata* subsp. *tenuis*

---

|            |        |              |                       |                                                    |
|------------|--------|--------------|-----------------------|----------------------------------------------------|
| Maputaland | 315485 | South Africa | Marine Protected Area | <i>Vigna unguiculata</i> subsp. <i>dekindtiana</i> |
|------------|--------|--------------|-----------------------|----------------------------------------------------|

*Vigna unguiculata* subsp. *stenophylla*

---

|             |        |              |                           |                                                    |
|-------------|--------|--------------|---------------------------|----------------------------------------------------|
| Mehlomnyama | 116325 | South Africa | Provincial Nature Reserve | <i>Vigna unguiculata</i> subsp. <i>stenophylla</i> |
|-------------|--------|--------------|---------------------------|----------------------------------------------------|

*Vigna unguiculata* subsp. *tenuis*

---

|        |      |              |                           |                          |
|--------|------|--------------|---------------------------|--------------------------|
| Midmar | 9103 | South Africa | Provincial Nature Reserve | <i>Vigna schlechteri</i> |
|--------|------|--------------|---------------------------|--------------------------|

*Vigna unguiculata* subsp. *stenophylla*

---

|           |      |              |                           |                          |
|-----------|------|--------------|---------------------------|--------------------------|
| Moor Park | 4942 | South Africa | Provincial Nature Reserve | <i>Vigna schlechteri</i> |
|-----------|------|--------------|---------------------------|--------------------------|

*Vigna unguiculata* subsp. *tenuis*

---

|             |        |              |                        |                          |
|-------------|--------|--------------|------------------------|--------------------------|
| Morgenstond | 300456 | South Africa | Private Nature Reserve | <i>Vigna schlechteri</i> |
|-------------|--------|--------------|------------------------|--------------------------|

*Vigna unguiculata* subsp. *dekindtiana*

---

|          |       |              |                           |                                                    |
|----------|-------|--------------|---------------------------|----------------------------------------------------|
| Mpenjati | 33139 | South Africa | Provincial Nature Reserve | <i>Vigna unguiculata</i> subsp. <i>stenophylla</i> |
|----------|-------|--------------|---------------------------|----------------------------------------------------|

*Vigna unguiculata* subsp. *tenuis*

---

|            |       |              |                           |                                                    |
|------------|-------|--------------|---------------------------|----------------------------------------------------|
| North Park | 26040 | South Africa | Provincial Nature Reserve | <i>Vigna unguiculata</i> subsp. <i>stenophylla</i> |
|------------|-------|--------------|---------------------------|----------------------------------------------------|

---

*Vigna unguiculata* subsp. *tenuis*

---

|          |      |              |                |                                                    |
|----------|------|--------------|----------------|----------------------------------------------------|
| Nylsvley | 7384 | South Africa | Nature Reserve | <i>Vigna unguiculata</i> subsp. <i>dekindtiana</i> |
|----------|------|--------------|----------------|----------------------------------------------------|

*Vigna unguiculata* subsp. *tenuis*

---

|             |      |              |                           |                                                    |
|-------------|------|--------------|---------------------------|----------------------------------------------------|
| Oribi Gorge | 4759 | South Africa | Provincial Nature Reserve | <i>Vigna unguiculata</i> subsp. <i>stenophylla</i> |
|-------------|------|--------------|---------------------------|----------------------------------------------------|

*Vigna unguiculata* subsp. *tenuis*

---

|           |        |              |                       |                                                    |
|-----------|--------|--------------|-----------------------|----------------------------------------------------|
| Pondoland | 306181 | South Africa | Marine Protected Area | <i>Vigna unguiculata</i> subsp. <i>stenophylla</i> |
|-----------|--------|--------------|-----------------------|----------------------------------------------------|

*Vigna unguiculata* subsp. *tenuis*

---

|                |      |              |                           |                                                    |
|----------------|------|--------------|---------------------------|----------------------------------------------------|
| Roodeplaat Dam | 7387 | South Africa | Provincial Nature Reserve | <i>Vigna unguiculata</i> subsp. <i>dekindtiana</i> |
|----------------|------|--------------|---------------------------|----------------------------------------------------|

*Vigna unguiculata* subsp. *stenophylla*

---

|                       |        |              |                           |                                                    |
|-----------------------|--------|--------------|---------------------------|----------------------------------------------------|
| Sileza Nature Reserve | 116333 | South Africa | Provincial Nature Reserve | <i>Vigna unguiculata</i> subsp. <i>dekindtiana</i> |
|-----------------------|--------|--------------|---------------------------|----------------------------------------------------|

*Vigna unguiculata* subsp. *stenophylla*

---

|         |       |              |                           |                                                    |
|---------|-------|--------------|---------------------------|----------------------------------------------------|
| Skyline | 62365 | South Africa | Provincial Nature Reserve | <i>Vigna unguiculata</i> subsp. <i>stenophylla</i> |
|---------|-------|--------------|---------------------------|----------------------------------------------------|

*Vigna unguiculata* subsp. *tenuis*

---

|       |       |              |                           |                                                    |
|-------|-------|--------------|---------------------------|----------------------------------------------------|
| Tembe | 39758 | South Africa | Provincial Nature Reserve | <i>Vigna unguiculata</i> subsp. <i>dekindtiana</i> |
|-------|-------|--------------|---------------------------|----------------------------------------------------|

*Vigna unguiculata* subsp. *stenophylla*

---

|           |        |              |                       |                                                    |
|-----------|--------|--------------|-----------------------|----------------------------------------------------|
| Trafalgar | 315491 | South Africa | Marine Protected Area | <i>Vigna unguiculata</i> subsp. <i>stenophylla</i> |
|-----------|--------|--------------|-----------------------|----------------------------------------------------|

*Vigna unguiculata* subsp. *tenuis*

---

|          |       |              |                           |                                                    |
|----------|-------|--------------|---------------------------|----------------------------------------------------|
| Umlalazi | 26030 | South Africa | Provincial Nature Reserve | <i>Vigna unguiculata</i> subsp. <i>dekindtiana</i> |
|----------|-------|--------------|---------------------------|----------------------------------------------------|

---

*Vigna unguiculata* subsp. *stenophylla*

---

|           |      |              |                           |                                                    |
|-----------|------|--------------|---------------------------|----------------------------------------------------|
| Umtamvuna | 1353 | South Africa | Provincial Nature Reserve | <i>Vigna unguiculata</i> subsp. <i>stenophylla</i> |
|-----------|------|--------------|---------------------------|----------------------------------------------------|

*Vigna unguiculata* subsp. *tenuis*

---

|             |       |              |                           |                          |
|-------------|-------|--------------|---------------------------|--------------------------|
| Umvoti Vlei | 26043 | South Africa | Provincial Nature Reserve | <i>Vigna schlechteri</i> |
|-------------|-------|--------------|---------------------------|--------------------------|

*Vigna unguiculata* subsp. *stenophylla*

---

|            |       |              |                           |                          |
|------------|-------|--------------|---------------------------|--------------------------|
| Wagendrift | 26042 | South Africa | Provincial Nature Reserve | <i>Vigna schlechteri</i> |
|------------|-------|--------------|---------------------------|--------------------------|

*Vigna unguiculata* subsp. *tenuis*

---

|        |      |              |                           |                          |
|--------|------|--------------|---------------------------|--------------------------|
| Weenen | 9106 | South Africa | Provincial Nature Reserve | <i>Vigna schlechteri</i> |
|--------|------|--------------|---------------------------|--------------------------|

*Vigna unguiculata* subsp. *tenuis*

---

|            |      |           |                |                          |
|------------|------|-----------|----------------|--------------------------|
| Malotlotja | 7445 | Swaziland | Nature Reserve | <i>Vigna schlechteri</i> |
|------------|------|-----------|----------------|--------------------------|

*Vigna unguiculata* subsp. *stenophylla*

---

|             |        |                              |                |                                                    |
|-------------|--------|------------------------------|----------------|----------------------------------------------------|
| Bamba Ridge | 301476 | Tanzania, United Republic of | Forest Reserve | <i>Vigna unguiculata</i> subsp. <i>dekindtiana</i> |
|-------------|--------|------------------------------|----------------|----------------------------------------------------|

*Vigna unguiculata* subsp. *pubescens*

---

|             |     |                              |               |                                                    |
|-------------|-----|------------------------------|---------------|----------------------------------------------------|
| Kilimanjaro | 922 | Tanzania, United Republic of | National Park | <i>Vigna unguiculata</i> subsp. <i>dekindtiana</i> |
|-------------|-----|------------------------------|---------------|----------------------------------------------------|

*Vigna unguiculata* subsp. *pawekiae*

---

|            |        |                              |                |                                                    |
|------------|--------|------------------------------|----------------|----------------------------------------------------|
| Kwamarimba | 301487 | Tanzania, United Republic of | Forest Reserve | <i>Vigna unguiculata</i> subsp. <i>dekindtiana</i> |
|------------|--------|------------------------------|----------------|----------------------------------------------------|

*Vigna unguiculata* subsp. *pubescens*

---

|          |        |                              |                |                                                    |
|----------|--------|------------------------------|----------------|----------------------------------------------------|
| Kwamgumi | 301479 | Tanzania, United Republic of | Forest Reserve | <i>Vigna unguiculata</i> subsp. <i>dekindtiana</i> |
|----------|--------|------------------------------|----------------|----------------------------------------------------|

---

*Vigna unguiculata* subsp. *pubescens*

---

|          |        |                              |                |                                                    |
|----------|--------|------------------------------|----------------|----------------------------------------------------|
| Magoroto | 351706 | Tanzania, United Republic of | Forest Reserve | <i>Vigna unguiculata</i> subsp. <i>dekindtiana</i> |
|----------|--------|------------------------------|----------------|----------------------------------------------------|

*Vigna unguiculata* subsp. *pubescens*

---

|       |        |                              |                |                                                    |
|-------|--------|------------------------------|----------------|----------------------------------------------------|
| Manga | 301484 | Tanzania, United Republic of | Forest Reserve | <i>Vigna unguiculata</i> subsp. <i>dekindtiana</i> |
|-------|--------|------------------------------|----------------|----------------------------------------------------|

*Vigna unguiculata* subsp. *pubescens*

---

|        |        |                              |                |                                                    |
|--------|--------|------------------------------|----------------|----------------------------------------------------|
| Mlinga | 351705 | Tanzania, United Republic of | Forest Reserve | <i>Vigna unguiculata</i> subsp. <i>dekindtiana</i> |
|--------|--------|------------------------------|----------------|----------------------------------------------------|

*Vigna unguiculata* subsp. *pubescens*

---

|        |        |                              |                |                                                    |
|--------|--------|------------------------------|----------------|----------------------------------------------------|
| Segoma | 301480 | Tanzania, United Republic of | Forest Reserve | <i>Vigna unguiculata</i> subsp. <i>dekindtiana</i> |
|--------|--------|------------------------------|----------------|----------------------------------------------------|

*Vigna unguiculata* subsp. *pubescens*

---

|                     |       |        |               |                                                    |
|---------------------|-------|--------|---------------|----------------------------------------------------|
| Bwindi Impenetrable | 18437 | Uganda | National Park | <i>Vigna unguiculata</i> subsp. <i>dekindtiana</i> |
|---------------------|-------|--------|---------------|----------------------------------------------------|

*Vigna unguiculata* subsp. *pawekiae*

---

|                  |        |        |               |                                                    |
|------------------|--------|--------|---------------|----------------------------------------------------|
| Mgahinga Gorilla | 313109 | Uganda | National Park | <i>Vigna unguiculata</i> subsp. <i>dekindtiana</i> |
|------------------|--------|--------|---------------|----------------------------------------------------|

*Vigna unguiculata* subsp. *pawekiae*

---

|                    |       |        |               |                                                    |
|--------------------|-------|--------|---------------|----------------------------------------------------|
| Rwenzori Mountains | 18438 | Uganda | National Park | <i>Vigna unguiculata</i> subsp. <i>dekindtiana</i> |
|--------------------|-------|--------|---------------|----------------------------------------------------|

*Vigna unguiculata* subsp. *pawekiae*

---

|               |      |          |               |                          |
|---------------|------|----------|---------------|--------------------------|
| Rhodes Nyanga | 1111 | Zimbabwe | National Park | <i>Vigna schlechteri</i> |
|---------------|------|----------|---------------|--------------------------|

*Vigna unguiculata* subsp. *dekindtiana*

---
